# Supplementary material for: High Riverine CO&lt;sub&gt;2&lt;/sub&gt; Outgassing affected by Land Cover Types in the Yellow River Source Region
Source: Copernicus journal article supplement (doi:10.5194/bg-2018-292), 2018-08-20
Supplement: Supplementary file [file bg-2018-292-AC5-supplement.pdf]

# High Riverine CO<sub>2</sub> Outgassing affected by Land Cover Types in the Yellow River Source Region

Mingyang Tian<sup>1</sup>, Xiankun Yang<sup>2</sup>, Lishan Ran<sup>3</sup>, Yuanrong Su<sup>1</sup>, Lingyu Li<sup>1</sup>,  
Ruihong Yu<sup>1</sup>, Haizhu Hu<sup>1\*</sup>, Xi Xi Lu<sup>1,4\*</sup>

5 <sup>1</sup>Inner Mongolia key laboratory of river and lake ecology, School of ecology and environment, Inner  
Mongolia University, Hohhot, 010021, China

<sup>2</sup>School of Geographical Sciences, Guangzhou University, Guangzhou, 510006, China

<sup>3</sup>Department of Geography, The University of Hong Kong, Hong Kong, China

<sup>4</sup>Department of Geography, National University of Singapore, 117570, Singapore

10

✉ *Corresponding author*

Xi Xi Lu Tel.: +86-471-4991469, Fax: +86-471-4991436, e-mail: [geoluxx@nus.edu.sg](mailto:geoluxx@nus.edu.sg)

Haizhu Hu Tel.: +86-471-4991469, Fax: +86-471-4991436, e-mail: [huhai Zhu@163.com](mailto:huhai Zhu@163.com)

15

**Abstract:** Under the context of climate change, studying CO<sub>2</sub> emissions in alpine rivers is important because of the huge carbon storage in these terrestrial ecosystems.

However, estimates of global riverine CO<sub>2</sub> emissions remain highly uncertain owing to absence of a comprehensive CO<sub>2</sub> emission measurement, especially in river source regions. In this study, riverine partial pressure of CO<sub>2</sub> ( $p\text{CO}_2$ ) and CO<sub>2</sub> efflux ( $F\text{CO}_2$ ) in the Yellow River source region under different landcover types, including glaciers, permafrost, wetlands, and grasslands, were investigated in April, June, August, and October 2016. Relevant chemical and environmental parameters were analyzed to explore the main controlling factors. The results showed that most of the rivers in the Yellow River source region were a net CO<sub>2</sub> source, with the  $p\text{CO}_2$  ranging from 181 to 2441  $\mu\text{atm}$  and the  $F\text{CO}_2$  from -221 to 6892  $\text{g C m}^{-2} \text{ yr}^{-1}$ . Both  $p\text{CO}_2$  and  $F\text{CO}_2$  showed strong spatial and temporal variations. Average  $F\text{CO}_2$  in August was higher than that in other months, with the lowest in October. In alpine climates, low temperature conditions played a crucial role in limiting biological activity and reducing CO<sub>2</sub> emissions. The lowest  $F\text{CO}_2$  values ( $-221 \text{ g C m}^{-2} \text{ yr}^{-1}$ ) were observed in the glacier and permafrost regions. By integrating seasonal changes of water surface area, total CO<sub>2</sub> efflux was estimated at  $0.37 \pm 0.49 \text{ Tg C yr}^{-1}$ , which is considerably higher than previous studies.

Although the rivers in the Yellow River source region annually release little CO<sub>2</sub>, there is a high carbon evasion potential. Our study suggested that the dissolved organic carbon (DOC) in permafrost rivers ( $5.0 \pm 2.4 \text{ mg L}^{-1}$ ) is equivalent to that in peatland covered rivers ( $5.1 \pm 3.7 \text{ mg L}^{-1}$ ), and the DOC is mainly derived from old carbon stored in frozen soils. In addition, for glacial rivers with limited supply of exogenous carbon, the intensity of CO<sub>2</sub> emissions is still considerable. Therefore, with rising temperature due to global warming, increased CO<sub>2</sub> emissions in these regions should not be ignored for a better assessment of global riverine CO<sub>2</sub> emissions.

**Key words:**  $p\text{CO}_2$ , CO<sub>2</sub> outgassing; glaciers; permafrost; wetland; grassland; Yellow River source region

## 1. Introduction

Rivers connect land and oceans, acting as pipes and containers transporting carbon and other substances from terrestrial ecosystems to the oceans. Existing studies on riverine CO<sub>2</sub> evasion focus mainly on the spatial and temporal dynamics of partial pressure of CO<sub>2</sub> ( $p\text{CO}_2$ ) and CO<sub>2</sub> efflux ( $F\text{CO}_2$ ) (Cole et al., 2001; Aufdenkampe et al., 2011; Raymond et al., 2013; Abril et al., 2014). Many researchers have argued that

river water CO<sub>2</sub> is primarily derived from respiration of terrestrial ecosystems and decomposition of organic matter in river (Raymond et al., 2013; Hotchkiss et al., 2015; Schelker et al., 2016; Ran et al., 2017). For example, Abril et al. (2014) pointed that wetlands are the primary source of riverine CO<sub>2</sub> emissions in the Amazon river. However, the sources and underlying mechanisms of riverine CO<sub>2</sub> dynamic for many rivers remain largely unknown. Therefore, to more accurately estimate riverine CO<sub>2</sub> outgassing and understand its driving factors, more studies focusing on rivers in particular climates (i.e., alpine climate) and regions (e.g., headwater region or intermitted rivers) are strongly needed to gain deeper insights into global carbon balance processes.

With respect to global-scale CO<sub>2</sub> outgassing, available estimates are characterized by great uncertainty. For example, recent global CO<sub>2</sub> outgassing fluxes from rivers and streams range from 0.65 to 3.2 P g C yr<sup>-1</sup> (Raymond et al., 2013; Lauerwald et al., 2015; Swakuchi et al., 2017; Drake et al., 2017), which are considerably higher than the earlier estimate by Cole et al. (2007) (i.e., 0.23 P g C yr<sup>-1</sup>). A major reason for the huge range is likely the absence of a global CO<sub>2</sub> outgassing database which includes direct CO<sub>2</sub> emission measurements over different rivers and under different climate and land cover types (Raymond et al., 2013; Cole et al., 2007; Aufdenkampe et al., 2011; Drake et al., 2017). More direct field measurements are therefore strongly needed to better refine global CO<sub>2</sub> efflux estimates.

Yet, there have been few studies on CO<sub>2</sub> effluxes of rivers in extreme geographical and climatic conditions, such as alpine rivers (Wu et al., 2008; Zhang et al., 2013). Crawford et al. (2013) investigated the riverine CO<sub>2</sub> outgassing in the Alaska region and explored its temporal and spatial changes under different land use types. Crawford et al. (2015) further studied carbon emissions from the rivers and lakes in alpine areas around the Estes Park in the United States and found that the average *p*CO<sub>2</sub> was only 417 µatm. They concluded that high altitude and low vegetation coverage are the primary factors limiting CO<sub>2</sub> outgassing. Weyhenmeyer et al. (2015) concluded that production of CO<sub>2</sub> in lakes was usually half of the CO<sub>2</sub> emissions and most of the degassed CO<sub>2</sub> was derived from dissolved inorganic carbon (DIC). Humborg et al. (2010) surveyed rivers in central and northern Sweden and determined that the average *p*CO<sub>2</sub> and *F*CO<sub>2</sub> was 1445 µatm and 3033 g C m<sup>-2</sup> yr<sup>-1</sup>, respectively. Overall, compared with temperate

and tropical rivers, riverine CO<sub>2</sub> outgassing under alpine climate is at a relatively low level. This is largely due to the cold climate with low temperature and high altitude that hamper riverine CO<sub>2</sub> emissions (Peter et al., 2014).

75

The riverine CO<sub>2</sub> emissions from the Yellow River Basin have been preliminarily studied. Su et al. (2005) reported that the mainstream *p*CO<sub>2</sub> was between 1100 and 1700 μatm, which were in intermediate-low level of world rivers. The main controlling factor was its carbonate system. Zhang et al. (2008) measured the *p*CO<sub>2</sub> of 1570 μatm at Lijin Hydrological Station on the lower Yellow River during sediment regulation period (June–July), which was higher than in other periods. Zhang et al. (2009) measured the *F*CO<sub>2</sub> of the Yellow River and concluded that the Yellow River waters were a source of atmospheric CO<sub>2</sub> during autumn and the flux was about 0.0174 Tg C, which was similar to that of the Ottawa River but far less than that of the Amazon in autumn. Ran et al. (2015b) estimated that the annual CO<sub>2</sub> emissions of the whole Yellow River system at 7.9 Tg C, which is close to the basin-wide carbon deposition of 8.7 Tg C while larger than the marine import (i.e., 6 Tg C). Ran et al. (2017) further studied the Wuding River, a tributary of the middle Yellow River, and concluded that lateral carbon derived from soil respiration and chemical weathering played a central role in controlling the riverine *p*CO<sub>2</sub>. In addition, radiocarbon analyses of the degassed CO<sub>2</sub> suggest the release of old carbon previously stored in soil horizons (Ran et al., 2018).

90

These studies on CO<sub>2</sub> emissions from the Yellow River were mainly confined to its middle and lower reaches. In contrast, to date little has been done on the upper reaches, especially the source region on the Tibetan Plateau. The Yellow River source region is located in the alpine zone with the Yellow River mainstream flowing through a variety of land cover types, including grassland, wetland, glacier, and permafrost. Affected by increasing temperature as a result of global warming, the alpine rivers in this region have become hot spots of riverine carbon cycle studies and warrant a thorough understanding of their implications for global climate change (Ulseth et al., 2018; Peter et al., 2014; Hood et al., 2015). Although Ran et al. (2015b) have estimated its *p*CO<sub>2</sub> and *F*CO<sub>2</sub> by using water chemistry data, there are no field-based direct measurements of CO<sub>2</sub> emissions from these alpine rivers.

100

To accurately determine the magnitude of riverine CO<sub>2</sub> outgassing and understand its underlying control mechanisms in this alpine climate region, we conducted *in situ* measurements of riverine CO<sub>2</sub> emissions under different land cover types, including grassland, peatland, glacier, and permafrost, in the Yellow River source region. The objectives of this study were to examine (1) the spatiotemporal patterns of CO<sub>2</sub> emissions under different land cover types; (2) the magnitudes of stream CO<sub>2</sub> emissions; and (3) the sources of riverine CO<sub>2</sub> in this alpine river system. Clearly, the obtained findings will lead to a greater understanding of riverine carbon export and CO<sub>2</sub> emissions, especially for alpine rivers, which will help refine the global estimates of riverine *FCO<sub>2</sub>*.

## 110 2. Materials and methods

### 2.1 Site description

The Yellow River originates from the Bayanhar Mountains in Tibetan Plateau, flows through the Loess Plateau and North China Plain, and eventually empties into Bohai Sea. Generally, the drainage basin above the Tangnaihai hydrological station is called the Yellow River source region (Figure 1). The study area is situated from 32°3'N 95°5'E to 36°1'N 103°3'E (Figure 1). In this region, most of the rivers flow through the Tibetan Plateau at an altitude of 3000–4000 m with meandering river channels. The study area is about  $1.32 \times 10^5$  km<sup>2</sup>, accounting for about 17.6 % of the Yellow River basin. The Yellow River source region is located in an alpine zone with a typical plateau continental climate affected by plateau monsoon (Yang et al., 1991). Its lithology is homogeneous and predominantly composed of shale and granite rocks (Chen et al., 2005). The climate is characterized by a pronounced seasonal variation with the wet season starting from June to September and the dry season from October to next May. Major land cover types of the source region include glacier, permafrost, wetland, and grassland.

Precipitation is the dominant source of runoff in the Yellow River source region. Its annual mean precipitation is 486 mm, accounting for approximately 96% of the total runoff (Liu et al., 2005). The annual evaporation varies from 800 to 1200 mm. Although the area of the source region represents only 17.6% of the whole Yellow River basin, it supplies over 33% of the basin's total water discharge (Sun et

al., 2009). In recent decades, precipitation in the source area has slightly increased owing to accelerating glacier melting (Chang et al., 2007), which has increased its relative importance of water flux for the whole Yellow River basin (Zhang et al., 2012).

## 2.2 Fieldwork and laboratory analyses

In this study, four fieldwork campaigns in the Yellow River source region were conducted in April, June, August, and October 2016. The riverine  $p\text{CO}_2$  and related environmental factors, including water temperature, pH, dissolved oxygen (DO), were monitored in the field under different land cover types. In total, there are 36 sampling points (Figure 1) and they can be categorized on the basis of complexity of river network structure and land cover types (i.e., glacier, permafrost, wetland, and grassland) (Table 1). In addition, three groundwater samples in grassland covered sub-catchments were collected to determine the  $p\text{CO}_2$  in groundwater. The temperature, pH, and DO were measured by using a Multi 3420 analyzer (WTW GmbH, Germany) with the accuracies of  $\pm 0.2\text{ }^\circ\text{C}$ ,  $\pm 0.004$ , and  $\pm 1.5\%$ , respectively. Before measurement, the pH probe was calibrated with three pH buffers (i.e., pH4.01, pH7.00, and pH10.01, respectively).

Prior studies suggested that, when pH ranges from 7 to 10,  $\text{HCO}_3^-$  represents 96% of alkalinity and alkalinity can be used to calculate DIC (Hunt et al., 2011). Alkalinity was determined by on-site titration in this study. The collected water samples were subjected to low-pressure suction filtration through a pre-fired glass fiber filter (Whatman GF/F, GE Healthcare Life Sciences, USA) with a pore diameter of  $0.7\text{ }\mu\text{m}$ . For each water sample, the alkalinity was titrated with  $0.1\text{ mol L}^{-1}\text{ HCl}$  within 12 hours after sampling. Triplicate titrations with Methyl orange as the indicator suggest that the analytical error below 3%. Beside alkalinity analysis, the remaining filtered water was transferred into 100 ml amber glass vials, poisoned with nitric acid, and preserved in refrigerator at  $4\text{ }^\circ\text{C}$  condition for dissolved organic carbon (DOC) measurement in laboratory. DOC was analyzed using a total organic carbon (TOC) analyzer (Elementar Analysensysteme GmbH, Germany), which has a precision better than 3%.

### 2.3 Determination of CO<sub>2</sub> emission

The CO<sub>2</sub> emission flux  $FCO_2$  was measured using the floating chamber method (Ran et al., 2017) with a Li-7000 CO<sub>2</sub>/H<sub>2</sub>O gas analyzer (Li-Cor, Inc, USA), which has a precision better than 1%. The Li-7000 gas analyzer was calibrated with standard CO<sub>2</sub> gases of 500 ppm and 2000 ppm before each measurement. The rectangular floating chamber has a volume of 17.8 L and a water surface area of 0.09 m<sup>2</sup>. The chamber walls were lowered 3 cm into water and mounted with plastic foams that had streamlined ends to limit artificial disruptions to near-surface turbulence. The chamber is covered with tin foil to reduce the influence of sun light's heating. Temperature inside chamber was measured with a waterproof thermometer. Prior to each deployment, the chamber was placed in air and the air inside the chamber was continuously circulated in a closed loop that was connected to the infrared Li-7000 gas analyzer through rubber-polymer tubes. The instrument automatically records the air CO<sub>2</sub> concentration and ambient atmospheric pressure. When the chamber was placed on water surface, the accumulating CO<sub>2</sub> concentration inside the chamber was recorded every 2 seconds, and each deployment lasted for 6–10 mins. In large rivers with relatively favorable flow conditions, the chamber was tied to a small rubber boat and freely drifted with flow to measure  $FCO_2$ . In contrast, we used the static chamber method to measure  $FCO_2$  in small rivers or streams which may have caused an overestimation of CO<sub>2</sub> evasion (Lorke et al., 2015). While the chamber was freely drifting at 32 sampling sites, we used the static deployment method only at 4 sampling sites, accounting for about 10% of the all sites.

The CO<sub>2</sub> efflux from water was calculated using following equation (Frankignoulle et al., 1988):

$$FCO_2 = 1000 \times (dpCO_2/dt) (V/RTS) \quad (1)$$

where,  $dpCO_2/dt$  is the slope of CO<sub>2</sub> change within the chamber (Pa d<sup>-1</sup>; converted from  $\mu\text{atm min}^{-1}$ ),  $V$  is the chamber volume (17.8 L),  $R$  is the gas constant,  $T$  is the chamber temperature (K), and  $S$  is the area of the chamber covering the water surface (0.09 m<sup>2</sup> in this study).

Surface water  $pCO_2$  was calculated using the headspace equilibrium method (Ran et al., 2017). By using an 1100 mL conical flask, 800 mL of water were collected 10 cm below water surface and the remaining volume of 300 mL was filled with ambient air. The flask was immediately closed with a lid and

vigorously shaken for 1 min to equilibrate the gas in water and air. The equilibrated gas was then injected into the calibrated Li-7000 gas analyzer. Triplicate measurements were performed at each site and the average was calculated (analytical error below  $\pm 3\%$ ). Surface water  $p\text{CO}_2$  was calculated based on the equations from Dickson et al. (2007):

$$p\text{CO}_2^{\text{water},i} = p\text{CO}_2^{\text{headspace},f} + \frac{V_h}{V_w} (p\text{CO}_2^{\text{headspace},f} - p\text{CO}_2^{\text{headspace},i}) / K_0 \left[ 1 + \frac{K_1}{[H^+]} + \frac{K_1 \cdot K_2}{[H^+]^2} \right] RT \quad (2)$$

where, the superscripts  $i$  and  $f$  represent the initial and final  $p\text{CO}_2$  ( $\mu\text{atm}$ ),  $V_h$  and  $V_w$  are the headspace volume and water volume, respectively,  $K_0$  is the solubility of  $\text{CO}_2$  in water calculated on the basis of solubility constants for  $\text{CO}_2$  from Weiss (1974),  $K_1$  and  $K_2$  are the thermodynamic reaction constants (Lueker et al., 2000),  $[H^+]$  represents the total concentration of hydrogen ions in final solution.  $R$  is the universal gas constant ( $8.314 \text{ J mol}^{-1} \text{ K}^{-1}$ ), and  $T$  is the water temperature (K). Temperature in the flask after equilibration was measured to correct for temperature changes relative to that of in situ river water. The initial  $p\text{CO}_2$  was taken as the  $\text{CO}_2$  concentration in ambient air before the headspace equilibration measurement.

Conventionally,  $F\text{CO}_2$  can also be estimated from the following equation.

$$F\text{CO}_2 = k \cdot K_H \cdot \Delta p\text{CO}_2 \quad (3)$$

where,  $k$  is the gas transfer velocity ( $\text{m d}^{-1}$ ),  $K_H$  is the Henry's constant for  $\text{CO}_2$  at a given temperature,  $F\text{CO}_2$  is the measured riverine  $\text{CO}_2$  efflux, and the  $\Delta p\text{CO}_2$  is the difference between the surface water and the atmosphere. Using the field-measured  $p\text{CO}_2$  in surface water and air,  $k$  can be computed by rearranging Equation (3). To compare our calculated  $k$  value with other studies, it was standardized to a Schmidt number of 600 ( $k_{600}$ ) by assigning the Schmidt number exponent to be 0.5 (Jähne et al., 1987).

We also predicted the  $k_{600}$  ( $\text{m d}^{-1}$ ) through the Model 5 developed by Raymond et al. (2012).

$$K_{600} = VS \times 2841 \pm 107 + 2.02 \pm 0.209 \quad (4)$$

where,  $V$  is the stream velocity ( $\text{m s}^{-1}$ ),  $S$  is the slope of rivers (unitless).

Previous studies indicate that  $k_{600}$  is affected by a number of environmental factors, such as wind speed,



slope, flow velocity, depth, and discharge (Wanninkhof et al., 1992; Zappa et al., 2007; Raymond et al., 2012). Using only flow velocity and slope of river channels would have caused overestimation for mountainous rivers due to their relatively high channel slope and thus higher flow velocity. Therefore, the extremely high  $k_{600}$  values calculated from Equation (3) were excluded from the comparison between our calculated  $k_{600}$  and the modeled  $k_{600}$ .

### 3.Results

#### 3.1 Characteristics of the hydro-chemical variables

Water temperature (Tw) varied from 0.1 to 27.7 °C with an average of  $11.9 \pm 5.7$  °C. Average Tw in June ( $15.1 \pm 3.5$  °C) and August ( $17.0 \pm 5.4$  °C) was considerably higher than that in April ( $8.4 \pm 3.8$  °C) and October ( $7.3 \pm 2.4$  °C). Seasonal Tw difference was more significant at the wetland ( $14.4 \pm 6.4$  °C) and grassland ( $12.5 \pm 5.4$  °C) sites than that at the glacier ( $7.5 \pm 4.1$  °C) and permafrost ( $10.0 \pm 4.0$  °C) sites. Spatial variability of the air temperature was consistent with that of the water temperature at almost all the sites, although it could be as high as 33 °C. The annual average air temperature in 2016 was  $16.7 \pm 6.3$  °C.

Water pH ranged from 6.97 to 9.02 with an average of  $7.89 \pm 0.64$  (Table 1). Mean pH based on all the stream samples was  $8.26 \pm 0.36$ ,  $8.55 \pm 0.45$ ,  $7.24 \pm 0.19$ , and  $7.52 \pm 0.36$  in April, June, August, and October, respectively. A slight decreasing trend can be observed with the land cover types in the order permafrost > glaciers > grassland > wetland, with the average pH value at  $8.13 \pm 0.93$ ,  $7.93 \pm 0.55$ ,  $7.85 \pm 0.59$ , and  $7.71 \pm 0.52$ , respectively (Table 1). Alkalinity ranged from 600 to 7600  $\mu\text{mol L}^{-1}$  with an average of  $2871 \pm 1381$   $\mu\text{mol L}^{-1}$  (Table 1). Alkalinity was higher in the cold months ( $3378$   $\mu\text{mol L}^{-1}$  in April and  $2941$   $\mu\text{mol L}^{-1}$  in October) than in the warm months ( $2644$   $\mu\text{mol L}^{-1}$  in June and  $2326$   $\mu\text{mol L}^{-1}$  in August).

DO values ranged from 2.7 mg  $\text{L}^{-1}$  to 12.1 mg  $\text{L}^{-1}$  and the basin-wide mean DO was  $7.8 \pm 0.6$  mg  $\text{L}^{-1}$  in April,  $7.1 \pm 1.4$  mg  $\text{L}^{-1}$  in June,  $6.7 \pm 0.7$  mg  $\text{L}^{-1}$  in August and  $7.7 \pm 0.7$  mg  $\text{L}^{-1}$  in October, respectively (Table 1). From the perspective of land cover, the highest DO values were observed at the glacier sites, with the annual average at  $7.6 \pm 0.8$  mg  $\text{L}^{-1}$ , followed by the permafrost sites ( $7.4 \pm 1.4$  mg  $\text{L}^{-1}$ ), the

grassland sites ( $7.3 \pm 0.9 \text{ mg L}^{-1}$ ), and the peatland sites ( $7.2 \pm 1.1 \text{ mg L}^{-1}$ ) (Table 1).

240 DOC ranged from  $0.2$  to  $12.2 \text{ mg L}^{-1}$  with an average of  $4.7 \pm 2.7 \text{ mg L}^{-1}$  (Table 1). DOC exhibited strong seasonality across the rivers. The highest DOC concentration occurred in April ( $5.0 \pm 1.6 \text{ mg L}^{-1}$ ), followed by August ( $4.9 \pm 3.6 \text{ mg L}^{-1}$ ) and June ( $4.7 \pm 2.9 \text{ mg L}^{-1}$ ), and the lowest was found in October ( $4.0 \pm 2.2 \text{ mg L}^{-1}$ ). From the perspective of land cover, the highest DOC concentrations were observed in the peatland with the annual average at  $5.1 \pm 3.7 \text{ mg L}^{-1}$ , followed by the permafrost ( $4.9 \pm 2.4 \text{ mg L}^{-1}$ ), the  
245 grassland ( $4.6 \pm 2.3 \text{ mg L}^{-1}$ ), and the glaciers ( $3.4 \pm 1.1 \text{ mg L}^{-1}$ ) (Table 1).

### 3.2 Spatial and temporal variations of $p\text{CO}_2$

The  $p\text{CO}_2$  ranged from  $181$  to  $2441 \text{ } \mu\text{atm}$  with an average of  $774 \pm 377 \text{ } \mu\text{atm}$ , nearly twofold the ambient air  $p\text{CO}_2$ . To better illustrate the spatial variability  $p\text{CO}_2$ , Figures 2a, 3a, and 2c showed its changes with  
250 land cover types. The highest average  $p\text{CO}_2$  value appeared in the peatland ( $937 \pm 466 \text{ } \mu\text{atm}$ ), followed by grassland ( $818 \pm 394 \text{ } \mu\text{atm}$ ), glacier ( $645 \pm 253 \text{ } \mu\text{atm}$ ), and the permafrost ( $600 \pm 212 \text{ } \mu\text{atm}$ ).

The  $p\text{CO}_2$  value showed different temporal variation characteristics for the four land cover types (Figures 2a, 3a, and 2c). In grassland, the average river  $p\text{CO}_2$  value in April, June, August, and October was  
255  $836 \pm 258 \text{ } \mu\text{atm}$ ,  $609 \pm 297 \text{ } \mu\text{atm}$ ,  $1086 \pm 551 \text{ } \mu\text{atm}$ , and  $734 \pm 253 \text{ } \mu\text{atm}$ , respectively. In comparison, the average peatland river  $p\text{CO}_2$  in April, June, August, and October was  $875 \pm 436 \text{ } \mu\text{atm}$ ,  $792 \pm 436 \text{ } \mu\text{atm}$ ,  $1156 \pm 630 \text{ } \mu\text{atm}$ , and  $926 \pm 285 \text{ } \mu\text{atm}$ , respectively. The  $p\text{CO}_2$  in these two land cover types showed the same temporal pattern with the highest  $p\text{CO}_2$  occurring in August and the lowest in June.

260 Unlike in the peatland and grassland regions, the riverine  $p\text{CO}_2$  in the glacier and permafrost regions showed relatively small variations but similar seasonal variation trends. In the glacier covered area, the average river  $p\text{CO}_2$  value in April, June, August, and October was  $635 \pm 122 \text{ } \mu\text{atm}$ ,  $506 \pm 31 \text{ } \mu\text{atm}$ ,  $738 \pm 449 \text{ } \mu\text{atm}$ , and  $632 \pm 132 \text{ } \mu\text{atm}$  respectively. In the permafrost covered area, the average river  $p\text{CO}_2$  value in April, June, August, and October was  $465 \pm 216 \text{ } \mu\text{atm}$ ,  $586 \pm 227 \text{ } \mu\text{atm}$ ,  $591 \pm 74 \text{ } \mu\text{atm}$ , and  $756 \pm 231 \text{ } \mu\text{atm}$ ,  
265 respectively.

### 3.3 Spatial and temporal variations of $FCO_2$

$CO_2$  emissions exhibited spatial and seasonal variations among the 36 stream sites (Table 1, Figures 2b, 3b, and 3d). The  $CO_2$  effluxes ranged from  $-221$  to  $1469\text{ g C m}^{-2}\text{ yr}^{-1}$  in April,  $-144$  to  $6892\text{ g C m}^{-2}\text{ yr}^{-1}$  in August, and  $-34$  to  $2321\text{ g C m}^{-2}\text{ yr}^{-1}$  in October. While the highest  $FCO_2$  was measured at the wetland sites (Site Pt 3 in August,  $6892\text{ g C m}^{-2}\text{ yr}^{-1}$ ), the lowest  $FCO_2$  was observed at permafrost sites (Site Pm 3 in April,  $-221\text{ g C m}^{-2}\text{ yr}^{-1}$ ) (Table 1). The averaged  $FCO_2$  of all sites was  $479\pm436$ ,  $261\pm205$ ,  $873\pm1220$ , and  $714\pm633\text{ g C m}^{-2}\text{ yr}^{-1}$  in April, June, August, and October, respectively. Clearly, rivers in the Yellow River source region were net carbon sources for the atmosphere, despite the great spatial and seasonal  $FCO_2$  variations. When grouped by land cover types, the mean  $CO_2$  efflux shows a clear decreasing trend from wetland ( $767\pm1644\text{ g C m}^{-2}\text{ yr}^{-1}$ ) through grassland ( $679\pm610\text{ g C m}^{-2}\text{ yr}^{-1}$ ) and glacier ( $508\pm588\text{ g C m}^{-2}\text{ yr}^{-1}$ ) to permafrost ( $302\pm349\text{ g C m}^{-2}\text{ yr}^{-1}$ ). Because the intensity of  $CO_2$  emissions depends on river  $pCO_2$ , the  $FCO_2$  showed a similar spatial and temporal pattern to the  $pCO_2$ , although the highest and lowest  $pCO_2$  and  $FCO_2$  value were not found at the same sampling sites.

## 4. Discussion

### 4.1 Impact of land cover types on riverine $pCO_2$ and $CO_2$ outgassing

This study shows that the lowest  $FCO_2$  appeared in the permafrost covered region among all land cover types, with the annual average at  $FCO_2$  of  $302\pm349\text{ g C m}^{-2}\text{ yr}^{-1}$ . It is well known that a large quantity of riverine  $CO_2$  is derived from land (Dinsmore and Billett., 2013; Hope et al., 2004). Particularly, rivers flowing through permafrost are characterized by higher organic carbon input from soils (Zeng et al., 2004), which can support higher riverine DOC export and lead to stronger  $CO_2$  outgassing. The correlation analysis between hydro-chemical parameters and  $pCO_2$  in the permafrost region showed that, while alkalinity, DO and DOC were not significantly correlated with  $pCO_2$ , pH exhibited a statistically significant relationship with  $pCO_2$  (Figure 4). The negative relationship between  $pCO_2$  and pH is likely because dissolved  $CO_2$  itself acts as an acid in water (Stumm and Morgan., 1996). In poorly buffered systems like the study area,  $CO_2$  can be a strong control on river water pH (Neal et al., 1998; Waldron et al., 2007). The DOC concentrations in the permafrost rivers (mean:  $5.0\pm2.4\text{ mg L}^{-1}$ ) were relatively

higher than that in the glacier rivers (mean:  $3.6 \pm 1.1 \text{ mg L}^{-1}$ ) and the grassland rivers ( $4.6 \pm 2.3 \text{ mg L}^{-1}$ ) but were comparable to the peatland rivers of  $5.1 \pm 3.7 \text{ mg L}^{-1}$  in peatlands. Additionally, the average alkalinity concentration in the permafrost region is the highest among the four land cover types. However, the  $p\text{CO}_2$  and  $F\text{CO}_2$  values in this region were always the lowest during the four campaigns. One potential explanation is that its low temperature (i.e., annual average water temperature:  $9.9^\circ\text{C}$ ) because of high elevation may have constrained soil respiration and riverine organic matter degradation (Battin et al., 2008). Furthermore, although there is sufficient dissolved  $\text{CO}_2$  in the river water, it may be difficult for  $\text{CO}_2$  to degas from rivers in view of the low temperature (thus strong solubility) and low flow velocity (average:  $0.8 \pm 0.5 \text{ m s}^{-1}$ ) (Alin et al., 2014). The lower temperature is likely the major reason for the high riverine DOC concentrations while low  $\text{CO}_2$  outgassing rates in the permafrost region.

Because the glacier region exhibits similar temperatures and elevations to the permafrost, its  $p\text{CO}_2$  and  $F\text{CO}_2$  values were also relatively low, with the average only at  $657 \pm 240 \text{ g C m}^{-2} \text{ yr}^{-1}$ . This is probably because all the sampling sites are located on the 1–2 order streams characterized by strong hydrologic connection with the terrestrial landscape (Sorribas et al., 2017; Smits et al., 2017), and the surrounding catchment is lack of exogenous terrestrial carbon input. The river water alkalinity of the glacier rivers showed constantly the lowest level throughout the study year (Table 1), due largely to the low coverage of carbonate rocks. For the glacier rivers, only the DOC was significantly related to  $p\text{CO}_2$  (Figure 5d,  $r^2=0.56$ ,  $p < 0.001$ ). The glacier sampling sites are mainly located around the Aemye Ma-chhen Range (Figure 1). Wang (1998) discovered that these rivers are predominantly supplied by glacier melting that is characterized by significant seasonal variability. The sampled glacier rivers showed the lowest annual average DOC concentration among the four land cover types ( $3.6 \pm 1.1 \text{ mg L}^{-1}$ ). This is probably because the sub-catchments around the Aemye Ma-chhen Range do not have sufficient vegetation coverage as a result of high elevation and low temperature, limiting the terrestrial source of DOC. Poor soil, short water retention time, and low precipitation are the main reasons for the low vegetation coverage in this region (Lu et al., 2001). The rivers flowing down the snow mountain cut deep into the B horizon of soils because of strong glacial erosion and retreat. Almost all the glacial sampling sites are characterized by gravel channel, limiting the supply of terrestrial organic carbon into river carbon pools. As a result, the measured

DOC concentrations in most of the sampled glacier rivers were very low. For glacial rivers, if there is no external supply of DOC, a complete decomposition of the river water DOC can only produce 0.34  $\mu\text{mol L}^{-1}$   $\text{CO}_2$ . This suggests that the  $\text{CO}_2$  produced by DOC degradation in the glacial river cannot maintain such a high  $\text{CO}_2$  outgassing rate.

The modern snow and ice which are important water sources in the Aemye Ma-chhen Range do not have enough DOC, DIC, or  $\text{CO}_2$  contents (Wu et al., 2008). Instead, chemical weathering may have played a crucial role in supporting glacier riverine  $\text{CO}_2$  (Wu et al., 2005; Wu et al., 2008). Previous studies have shown that glaciers contain large amounts of  $\text{CO}_2$  (Meese et al., 1997) and DOC (Hood et al., 2009; Singer et al., 2012), which are important sources of  $\text{CO}_2$  for glacial rivers. Our observations found that, with increasing distance from the glaciers, the riverine  $p\text{CO}_2$  exhibited a decreasing trend, which is likely caused by the dilution of glacier-related  $p\text{CO}_2$ .

The  $f\text{CO}_2$  was highest in the peatland rivers among the studied 4 land cover types. Only the pH showed a negative linear relationship with the  $p\text{CO}_2$ , while the alkalinity had a weak linear relationship with the  $p\text{CO}_2$  (Figure 6). For peatland rivers, terrestrially-derived organic carbon has been widely recognized an important source of riverine  $\text{CO}_2$  (Abril et al., 2014; Müller et al., 2015; Billett et al., 2015; Hu et al., 2015). There are a variety of sources for DOC in the peatland. First, the soil in the wetland ecosystem is rich in peat soil. The amount of peat stock in the Zoige Peatland is estimated to be 1.9 billion tons, accounting for about 40% of China's marsh wetland carbon storage (Wang et al., 2012). These carbon supplies to river carbon pools are an important driver for the high  $f\text{CO}_2$  in the wetland rivers. In addition, soil pore water enriched with high concentrations of dissolved  $\text{CO}_2$  continues to enter river waters, which can provide enough riverine  $\text{CO}_2$  (Butman et al., 2011). Furthermore, vegetation in the peatland region can import large amounts of  $\text{CO}_2$  into the river water through two mechanisms. On one hand, vegetation litter and root exudates release degradable organic matter into rivers. Decomposition of these organic matter serves as a carbon source for heterotrophic microorganisms. During this process, heterotrophic organisms release  $\text{CO}_2$  into water (Abril et al., 2014). On the other hand, respiration of plant roots and soil microorganisms that are submerged in wetland soils could also release  $\text{CO}_2$  directly into river water (Abril et al., 2014). The combined effects of these factors have resulted in rivers with high DOC and  $f\text{CO}_2$  values in wetlands.

350

The average  $FCO_2$  in the grassland rivers of  $818 \pm 394 \text{ g C m}^{-2} \text{ yr}^{-1}$  is at a moderate level, lower than the wetland  $FCO_2$  but considerably higher than that in the glacier and permafrost rivers. Correlation analyses between water chemistry parameters and riverine  $pCO_2$  for the grassland rivers showed that both pH and DOC had weak correlations with  $pCO_2$  (Figure 7). This also suggests that  $pCO_2$  is partially affected by

355

the water pH. Compared to the other three land cover types, grassland has been substantially affected by human activity (i.e., grazing). Consequently, besides the DOC derived from physical erosion, the pollutants produced by grazing are also important sources of riverine DOC. The average  $pCO_2$  in peatland is 15% higher, but the average DOC concentration in wetland is 11% higher than that in grassland, and the alkalinity in grassland rivers is 46% higher than that in the wetland rivers. In addition, DIC is an

360

important source of riverine  $CO_2$  for grassland rivers. While stream DIC source are highly variable across space and time (Smits et al., 2017), most of the  $HCO_3^-$  in the Yellow River source region is derived from carbonate and silicate weathering (Wu et al., 2005; Wu et al., 2008; Wu et al., 2008), which largely reflects the contribution of groundwater inflow (Marx et al., 2017). Our groundwater samples from grassland region show an average  $pCO_2$  of  $1976 \mu\text{atm}$ , which is 2.5 times the average  $pCO_2$  of the whole Yellow River source region. Therefore, the  $CO_2$  excess in the grassland rivers is more likely maintained by both the terrestrial organic carbon input and the inorganic carbon from groundwater.

365

370

With respect to the  $k_{600}$ , the computed  $k_{600}$  showed statistically significant but weak correlation with the modeled results (Figure 8a) when the high  $k_{600}$  values ( $>70 \text{ m d}^{-1}$ ) were removed from analysis. Given the chamber's dampening effect of wind (Matthews et al., 2003), there was no any statistically significant relationship between wind and  $k_{600}$  for streams. Instead, flow velocity is a relatively good predictor of  $k_{600}$  and can approximately explain 15% of its variability (Figure 8b). Although we deployed the floating chamber very carefully, the statistical analysis could not reflect the complex interactions of various environment factors except the four land cover types through our 36 sampling sites. Additionally, it is worth noting that the Model 5 of Raymond et al. (2012) has overestimated the  $k_{600}$ , especially for mountainous rivers. This is probably because of low water temperature that has constrained  $CO_2$  degassing although the steeper channel slope has caused stronger flow turbulence (Battin et al., 2008). A

375

low temperature will limit the rate of Brownian motion and reduce the CO<sub>2</sub> exchange with the atmosphere.

Meanwhile, a low temperature will increase the solubility of dissolved CO<sub>2</sub>, thus reducing the outgassing

380 of CO<sub>2</sub>.

## 4.2 Significance and implications for riverine carbon budgets

This study demonstrates that the annual average  $p\text{CO}_2$  is  $771 \pm 380 \mu\text{atm}$  and  $F\text{CO}_2$  is  $590 \pm 766 \text{ g C m}^{-2} \text{ yr}^{-1}$  in the Yellow River source region. In comparison, Ran et al. (2015a; 2015b) estimated a considerably  
385 lower  $p\text{CO}_2$  value of  $241 \pm 79 \mu\text{atm}$  and an areal CO<sub>2</sub> efflux of  $-221 \pm 112 \text{ g C m}^2 \text{ yr}^{-1}$  for the Yellow River source region, indicative of a strong carbon uptake from the atmosphere. Combining the seasonal difference of water surface area between the wet season (122 days and a water surface area of 770 km<sup>2</sup>) and the dry season (243 days and a water surface area of 560 km<sup>2</sup>), we estimated a total CO<sub>2</sub> efflux from the Yellow River source region at  $0.37 \pm 0.49 \text{ T g C yr}^{-1}$ . This suggests a net carbon source for the  
390 atmosphere. Our CO<sub>2</sub> effluxes contrast with the earlier estimate by Ran et al. (2015b) which reported a carbon sink of  $-0.17 \pm 0.08 \text{ T g C yr}^{-1}$ .

Unlike our systematic sampling within the Yellow River source region, Ran et al. (2015b) estimated its riverine CO<sub>2</sub> outgassing by using only results at five sampling sites. There may have caused the huge  
395 CO<sub>2</sub> efflux difference. Firstly, the sampling by Ran et al. (2015b) was confined to the mainstem and major tributaries, which may have underestimated CO<sub>2</sub> emissions from lower-order headwater streams that usually present strong CO<sub>2</sub> degassing (Butman and Raymond, 2011). For example, our sampling in the Zoige peatland rivers demonstrated that the lower-order rivers exhibit substantially higher  $F\text{CO}_2$  ( $767 \pm 1144 \text{ g C m}^{-2} \text{ yr}^{-1}$ ) than the Yellow River mainstem ( $351 \pm 306 \text{ g C m}^{-2} \text{ yr}^{-1}$ ). This reveals the impact  
400 of strong flow turbulence and land-river connectivity of low-order streams on sustaining the high CO<sub>2</sub> effluxes (Crawford et al., 2013). In addition, the importance of groundwater inflow may decline with increasing stream orders, leading to a decreasing  $p\text{CO}_2$  and thus lower  $F\text{CO}_2$  (Marx et al., 2017). Another potential reason is that the number of sampling sites has limited the accuracy of CO<sub>2</sub> emissions. This is highly possible for the Yellow River source region with the  $p\text{CO}_2$  in groundwater ( $1976 \mu\text{atm}$ ) 2.5 times  
405 higher than that in the river ( $771 \pm 380 \mu\text{atm}$ ). The CO<sub>2</sub> originating from groundwater can be quickly

released to the atmosphere within a short distance (Hotchkiss et al., 2015). Obviously, it is considerably challenging to detect the impact of groundwater inflow without high-resolution sampling.

While the Yellow River source region occupies 17.6% of the whole Yellow River basin, it accounts for only around 4% of the basin's total CO<sub>2</sub> efflux (Ran et al., 2015a; 2015b). The CO<sub>2</sub> efflux of the Yellow River source region is also small compared with the effluxes from boreal river catchments (Teodoru et al., 2009; Butman and Raymond., 2011; Crawford et al., 2013; 2015; Kokic et al., 2015; Looman et al., 2016) or even smaller relative to the global CO<sub>2</sub> efflux (Aufdenkampe et al., 2011). Nevertheless, there is a huge carbon emission potential in the coming decades. Since the permafrost and wetland in the Yellow River source region are abundant in huge quantities of carbon storage. Continuously increasing temperature due to global warming will accelerate not only the mobilization of organic carbon in permafrost, but also the degradation of organic carbon by soil microorganisms. As a consequence, increasing riverine CO<sub>2</sub> effluxes are highly anticipated and warrant further studies to comprehensively understand their implications for global carbon cycle and climate change.

We have comprehensively evaluated the riverine carbon dynamics within the Yellow River source region by means of *in situ* measurement of CO<sub>2</sub> emissions under four different land cover types. However, it must be noted that there are still great uncertainties to be properly addressed in future studies. Despite the significant increase in the number of sampling sites compared with previous studies, less research on single watersheds that are spatially representative has been performed. Moreover, temporally continuous sampling involving the diel dynamics of riverine carbon export remains lacking. For example, prior studies suggest CO<sub>2</sub> efflux during the daytime would be completely different from that at night and floods may have a huge shift on CO<sub>2</sub> emissions (Geeraert et al., 2017; Smits et al., 2017).

## 5. Conclusions

Based on four rounds of field direct measurements of CO<sub>2</sub> outgassing within the Yellow River source region, the average *p*CO<sub>2</sub> in the study area was estimated at 771±380 μatm and the average *F*CO<sub>2</sub> was 590±766 g C m<sup>-2</sup> yr<sup>-1</sup>. The *F*CO<sub>2</sub> and *p*CO<sub>2</sub> are lower than other rivers in the world and at a relatively



low level compared to the middle and lower reaches of the Yellow River. The results showed that the rivers in the Yellow River source region were net sources of atmospheric CO<sub>2</sub>. Both the  $p\text{CO}_2$  and  $F\text{CO}_2$  showed strong spatial and temporal variations. The largest riverine CO<sub>2</sub> efflux was found in August, followed by October and April, and the lowest was observed in June. When grouped into different land cover types, the  $F\text{CO}_2$  in the permafrost river was the lowest among the four types of land cover. The highest  $F\text{CO}_2$  was found in peatland rivers, followed by rivers in the grassland and glacier regions.

For the Yellow River source region with an alpine climate, the low temperature conditions have played a crucial role in limiting its biological activity and reducing CO<sub>2</sub> emissions. As a consequence, these

procedures control both the riverine CO<sub>2</sub> sources and gas transfer velocity across the water-air interface.

The DOC concentration acts as an important control on riverine CO<sub>2</sub> dynamics under all the four land cover types. In the permafrost region, the large amounts of terrestrially-derived DOC supported its high  $p\text{CO}_2$  levels. While in the glacier region, the glacial DOC and CO<sub>2</sub> may have played an essential role in determining CO<sub>2</sub> outgassing. In the peatland and grassland regions, decomposition of plant-derived organic matter is an important source of riverine CO<sub>2</sub>. Moreover, groundwater inflow and chemical weathering played an important role in supporting riverine CO<sub>2</sub> for the whole Yellow River source region.

By integrating the seasonal changes of water surface area, the riverine CO<sub>2</sub> efflux of the Yellow River source region was estimated at  $0.37 \pm 0.49 \text{ Tg C yr}^{-1}$ , which is significantly higher than earlier estimates (e.g.,  $-0.168 \pm 0.084 \text{ Tg C yr}^{-1}$  by Ran et al. (2015a; 2015b)). To date, very few studies have focused on the dynamics of riverine carbon cycling on the Tibetan Plateau river systems. This study provides insight into the riverine CO<sub>2</sub> outgassing in the Yellow River source region, which will improve our current understanding of CO<sub>2</sub> emissions from alpine rivers in the world, in particular these located on the Tibetan Plateau.

**Acknowledgements:** This research was supported by the Natural Science Foundation of China (Grant No. 91547110; 51469018) and the National University of Singapore (Grant No. R-109-000-191-646; R-109-000-227-115). Special thanks go to the two anonymous reviewers for their constructive comments

which greatly improved the manuscript.

465 **Reference**

- Abril, G., Martinez, J.M., Artigas, L. F., Moreira-Turcq, P., Benedetti, M. F., Vidal, L., Meziane, T., Kim, J.-H., Bernardes, M. C., and Savoye, N.: Amazon River carbon dioxide outgassing fueled by wetlands, *Nature*, 505, 395–398, 2014.
- Alin, S. R., Maria, D. F. F. L. R., Salimon, C. I., Richey, J. E., Holtgrieve, G. W., Krusche, A. V., and  
470 Snidvongs, V.: Physical controls on carbon dioxide transfer velocity and flux in low-gradient river systems and implications for regional carbon budgets. *Journal of Geophysical Research Biogeosciences*, 116 (G1), 248–255, 2014.
- Aufdenkampe, A. K., Mayorga, E., Raymond, P.A., Melack, J. M., Doney, S. C., Alin, S. R., Aalto, R. E., and Yoo, K.: Riverine coupling of biogeochemical cycles between land, oceans, and atmosphere.  
475 *Frontiers in Ecology & the Environment*, 9 (1), 53–60, 2011.
- Battin, T. J., Kaplan, L. A., Findlay, S., Hopkinson, C. S., Marti, E., Packman, A. I., Newbold, J. D., and Sabater, F.: Biophysical controls on organic carbon fluxes in fluvial networks. *Nature Geoscience*, 1 (8), 95–100, 2008.
- Billett, M. F., Garnett, M. H., and Dinsmore, K. J.: Should aquatic CO<sub>2</sub> evasion be included in  
480 contemporary carbon budgets for peatland ecosystems? *Ecosystems*, 18 (3), 471–480, 2015.
- Butman, D., and Raymond, P. A.: Significant efflux of carbon dioxide from streams and rivers in the United States, *Nature Geoscience*, 4, 839–842, 2011.
- Chang, G., Li, L., Zhu, D., Wang, Z., Xiao, J., and Li, F.: Changes and Influencing Factor s of Surface Water Resources in the Source Region of the Yellow River. *Acta Geographica Sinica*, (03): 312–320,  
485 2007.
- Chen, J., Wang, F., Meybeck, M., He, D., Xia, X., and Zhang, L.: Spatial and temporal analysis of water chemistry records (1958–2000) in the Huanghe (Yellow River) basin. *Global Biogeochemical Cycles*, 19(3), 2005.
- Crawford, J. T., Striegl, R. G., Wickland, K. P., Dornblaser, M. M., and Stanley, E. H.: Emissions of  
490 carbon dioxide and methane from a headwater stream network of interior Alaska. *Journal of Geophysical Research Biogeosciences*, 118 (2), 482–494, 2013.
- Crawford, J. T., Dornblaser, M. M., Stanley, E. H., Clow D. W., and Striegl R. D.: Source limitation of carbon gas emissions in high-elevation mountain streams and lakes. *Journal of Geophysical Research Biogeosciences*, 120 (5): 952–964, 2015.
- 495 Cole, J. J., Cole, J. J., Caraco, N. F., and Caraco, N. F.: Carbon in catchments: connecting terrestrial carbon losses with aquatic metabolism. *Marine & Freshwater Research*, 52 (1), 101–110, 2001.
- Cole, J. J., Prairie, Y. T., Caraco, N. F., McDowell, W. H., Tranvik, L. J., Striegl, R. G., Duarte, C. M., Kortelainen, P., Downing, J. A., Middelburg, J. J., and Melack, J.: Plumbing the global carbon cycle: Integrating inland waters into the terrestrial carbon budget, *Ecosystems*, 10, 171–184, 2007.
- 500 Dickson, A. G., Sabine, C. L., and Christian, J. R.: Guide to best practices for ocean CO<sub>2</sub> measurements. Pices Special Publication, 2007.

- Dinsmore, K. J., M. F. Billett, and K. E. Dyson, Temperature and precipitation drive temporal variability in aquatic carbon and GHG concentrations and fluxes in a peatland catchment, *Global Change Biol.*, 19 (7), 2133–2148, 2013.
- 505 Drake, T. W., Raymond, P. A., and Spencer, R. G.: Terrestrial carbon inputs to inland waters: A current synthesis of estimates and uncertainty, *Limnology and Oceanography Letters*, doi: 10.1002/lol2.10055, 2017.
- Frankignoulle, M.: Field measurement of air-sea CO<sub>2</sub> exchange. *Optik-International Journal for Light and Electron Optics*, 33 (3), 313–322, 1988.
- 510 Geeraert, N., Omengo, F. O., Borges, A. V., Govers, G., and Bouillon, S.: Shifts in the carbon dynamics in a tropical lowland river system (Tana River, Kenya) during flooded and non-flooded conditions, *Biogeochemistry*, 132, 141–163, 2017.
- Hood, E., Battin, T. J., Fellman, J., O'neel, S., and Spencer, R. G.: Storage and release of organic carbon from glaciers and ice sheets, *Nature Geoscience*, 8, 91–96, 2015.
- 515 Hood, E., Fellman J., Spencer R., Hernes P., Edwards R., Amore D., and Scoot D.: Glaciers as a source of ancient and labile organic matter to the marine environment, *Nature*, 462, 1044–1047, 2009.
- Hope, D., S. M. Palmer, M. F. Billett, and J. J. C. Dawson, Variations in dissolved CO<sub>2</sub> and CH<sub>4</sub> in a first-order stream and catchment: A investigation of soil-stream linkages, *Hydrological Process.*, 18(17), 3255–3275, 2004.
- 520 Hotchkiss, E. R., Jr, R. O. H., Sponseller, R. A., Butman, D., Klaminder, J., Laudon, H., Rosvall, M., and Karlsson.: Sources of and processes controlling CO<sub>2</sub> emissions change with the size of streams and rivers. *Nature Geoscience*, 8 (9), 2015.
- Hu, J.: GHG gas emissions and spatiotemporal variation from rivers in Zoige plateau, Northwest A&F University, 2015.
- 525 Hunt, C. W., Salisbury, J. E., and Vandemark, D.: Contribution of non-carbonate anions to total alkalinity and overestimation of *p*CO<sub>2</sub> in new England and New Brunswick rivers. *Biogeosciences*, 8 (10), 3069–3076, 2011.
- Humborg, C., C.-M. Mörtz., M. Sundbom., H. Borg., T. Blenckner., R. Giesler., and V. Ittekkot.: CO<sub>2</sub> supersaturation along the aquatic conduit in Swedish watersheds as constrained by terrestrial
- 530 respiration, aquatic respiration and weathering. *Global Change Biology*, 16 (7): 1966–1978, 2010.
- Jähne, B., Heinz, G., and Dietrich, W.: Measurement of the diffusion coefficients of sparingly soluble gases in water. *Journal of Geophysical Research Oceans*, 92(C10), 10767–10776, 1987.
- Kokic, J., Wallin, M. B., Chmiel, H. E., Denfeld, B. A., and Sobek, S.: Carbon dioxide evasion from headwater systems strongly contributes to the total export of carbon from a small boreal lake
- 535 catchment. *Journal of Geophysical Research, Biogeosciences*, 120, 13–28, 2015.
- Lauerwald, R., G. G. Laruelle, J. Hartmann, P. Ciais, and P. A. G. Regnier.: Spatial patterns in CO<sub>2</sub> evasion from the global river network, *Global Biogeochem. Cycles*, 29, 534–554, 2015.
- Looman, A., Santos, I. R., Tait, D. R., Webb, J. R., Sullivan, C. A., and Maher, D.T.: Carbon cycling and exports over diel and flood-recovery timescales in a subtropical rainforest headwater stream. *Science of*
- 540 *the Total Environment*, 550, 645–657, 2016.
- Lorke, A., Bodmer, P., Noss, C., Alshboul, Z., Koschorreck, M., Somlai-Haase, C., Bastviken, D., Flury, S., McGinnis, D. F., Maeck, A., Müller, D., and Premke, K.: Technical note: drifting versus anchored flux chambers for measuring greenhouse gas emissions from running waters, *Biogeosciences*, 12,

7013-7024, 2015.

- 545 Lueker T, Dickson A, and Keeling C.: Ocean  $p\text{CO}_2$  calculated from dissolved inorganic carbon, alkalinity, and equations for  $K_1$  and  $K_2$ : Validation based on laboratory measurements of  $\text{CO}_2$  in gas and seawater at equilibrium. *Marine Chemistry*, 70(1):105-119, 2000.
- Lu, Z., Gao, H., Qiu, S., and Lin, Y.: The Remote Sensing Investigation and Research on Vegetation Coverage Characteristics and Environmental Impact in the Upper Reaches and Source Regions of the Yellow River. *Shanxi Environment*, 8(4):36–38, 2001.
- 550 Marx A, Dusek J, Jankovec J, Sanda, M., Vogel, T., Geldern, R.V., Hartmann, J., and Barth, J.A.C.: A review of  $\text{CO}_2$  and associated carbon dynamics in headwater streams: A global perspective. *Reviews of Geophysics*, 55(2):560-585, 2017.
- Matthews, C. J., St Louis, V. L., and Hesslein, R. H.: Comparison of three techniques used to measure diffusive gas exchange from sheltered aquatic surfaces. *Environmental Science & Technology*, 37(4), 772, 2003.
- 555 Meese, D., Gow, A., Alley, R., Zielinski, G., Grootes, P., Ram, M., Taylor, K., Mayewski, P., and Bolzan, J.: The Greenland Ice Sheet Project 2 depth-age scale: Methods and results, *Journal of Geophysical Research Oceans*, 102(C12):26411–26423, 1997.
- 560 Neal, C., W. A. House., H. P. Jarvie., and A. Eartherall.: The significance of dissolved carbon dioxide in major lowland rivers entering the North Sea, *Science of the Total Environment*, s 210–211 (1–6): 187–203, 1998.
- Peter, H., Singer, G. A., Preiler, C., Chiffard, P., Steniczka, G., and Battin, T. J.: Scales and drivers of temporal  $p\text{CO}_2$  dynamics in an Alpine stream, *Journal of Geophysical Research: Biogeosciences*, 119, 1078–1091, 2014.
- 565 Ran, L., Lu, X X., Richey, J E., Sun, H., Han, J., Yu, Y., Liao, S., and Yi, Q.: Long-term spatial and temporal variation of  $\text{CO}_2$  partial pressure in the Yellow River, China. *Biogeosciences*, 2015a, 12(4):921-932.
- Ran, L., Lu, X. X., Yang, H., Li, L., Yu, R., Sun, H., and Han, J.:  $\text{CO}_2$  outgassing from the Yellow River network and its implications for riverine carbon cycle. *Journal of Geophysical Research: Biogeosciences*, 2015b, 120:1334–1347.
- 570 Ran, L., Li, L., Tian, M., Yang, X., Yu, R., Zhao, J., Wang, L., Lu, X.: Riverine  $\text{CO}_2$  emissions in the Wuding River catchment on the Loess Plateau: Environmental controls and dam impoundment impact. *Journal of Geophysical Research Biogeosciences*, 122 (6), 2017.
- 575 Ran, L., Tian, M., Fang, N., Wang, S., Lu, X., Yang, X., and Frankie, C.: Riverine carbon export in the arid to semiarid Wuding River carchment on the Chinese Loess Plateau. *Journal of Geophysical Research Biogeosciences*, 15(12), 3857-3871, 2018.
- Sawakuchi, H. O., Neu, V., Ward, N.D., Barros, M., Valerio, A., Gagne-Maynard, W., Cunha, A., Less, D., Diniz, J., Brito, C., Krusche, A., and Richey, J.: Carbon dioxide emissions along the lower Amazon River, *Front. Mar. Sci.*, 4(76), 2017.
- 580 Raymond, P.A., Zappa, C.J., Butman, D., Bott, T. L., Potter, J., Mulholland, P., Laursen, A. E., McDowell, W. H., and Newbold, D.: Scaling the gas transfer velocity and hydraulic geometry in streams and small rivers. *Limnology and Oceanography: Fluids and Environments*, 2(1), 2012.
- Raymond, P. A., Hartmann, J., Lauerwald, R., Sobek, S., McDonald, C., Hoover, M., Butman, D., Striegl, R., Mayorga, E., and Humborg, C.: Global carbon dioxide emissions from inland waters,
- 585

Nature, 503, 355–359, 2013.

Schelker J., Singer G.A., Ulseth A.J., Hengsberger S., and Battin T.J.: CO<sub>2</sub> evasion from a steep, high gradient stream network: importance of seasonal and diurnal variation in aquatic *p*CO<sub>2</sub> and gas transfer. *Limnology & Oceanography*, 61:1826–38, 2016. doi:10.1002/lno.10339.

590 Singer, G., Fasching, C., Wilhelm, L., Niggemann, J., Steier, P., Dittmar, T., Battin, T.: Biogeochemically diverse organic matter in Alpine glaciers and its downstream fate. *Nature Geoscience*, 5, 710–714, 2012.

Smits, A. P., Schindler, D. E., Holtgrieve, G. W., Jankowski, K. J., and French, D. W.: Watershed geomorphology interacts with precipitation to influence the magnitude and source of CO<sub>2</sub> emissions from Alaskan streams, *Journal of Geophysical Research: Biogeosciences*, 122, 1903–1921, 2017.

595 Sorribas, M. V., Motta Marques, D., Castro, N. M. d. R., and Fan, F. M.: Fluvial carbon export and CO<sub>2</sub> efflux in representative nested headwater catchments of the eastern La Plata River Basin, *Hydrological Processes*, 31, 995–1006, 2017.

Stumm, W., and J. J. Morgan.: *Aquatic Chemistry: Chemical equilibria and Rates in Natural Waters*, Cram101 Textbook Outlines to Accompany, 179 (11): A277, 1996.

Sun, W., Cheng, B., and Li, R.: Multi time Scale Correlations Between Runoff and Regional Climate Variations in the Source Region of the Yellow River. *Acta Geographica Sinica*, (01): 117–127, 2009.

Su, Z., Zhang, L., and Wang, X.: Influencing factors of partial pressure of CO<sub>2</sub> in Huanghe (Yellow River). *Marine Science*, 2005, (4): 41–44.

605 Teodoru, C. R., del Giorgio, P. A., Prairie, Y. T., and Camire, M.: Patterns in *p*CO<sub>2</sub> in boreal streams and rivers of northern Quebec, Canada. *Global Biogeochemical Cycles*, 23, 2009.

Ulseth, A. J., Bertuzzo, E., Singer, G. A., Schelker, J., and Battin, T. J.: Climate-induced changes in spring snowmelt impact ecosystem metabolism and carbon fluxes in an alpine stream network, *Ecosystems*, 21, 373–390, 2018.

610 Waldron, S., E. M. Scott, and C. Soulsby.: Stable isotope analysis reveals lower-order river dissolved inorganic carbon pools are highly dynamic, *Environmental Science & Technology*, 41(17):6156–6162, 2007. doi:10.1021/es0706089.

Wang, J.T.: Climatic Geomorphology of the Anyemaqen Mountains. *Journal of Glaciology and Geocryology*, 10(2):161–171, 1988.

615 Wang, M., Liu, Z., Ma, X., and Wang, G.: Division of Organic Carbon Reserves of Peatlands in China. *Wetland Science*, (2): 156–163, 2012.

Wang, S., Sheng, Y., Gao, W., Li, J., Ma, S., Hu, Y.: Estimation of permafrost ice reserves in the source area of the Yellow River using landform classification, *Advances in Water Science*, 28 (6): 801–810, 2017.

620 Wanninkhof R.: Relationship between wind speed and gas exchange over the ocean.: *Journal of Geophysical Research Oceans*, 97(C5): 7373–7382, 1992.

Weiss, R. F.: Carbon dioxide in water and seawater: the solubility of a non-ideal gas, *Marine Chemistry*, 2, 203–215, 1974.

Weyhenmeyer, G., Kosten S., Wallin, M., Tranvik, L., Jeppesen, E., and Roland, F.: Significant fraction of CO<sub>2</sub> emissions from boreal lakes derived from hydrologic inorganic carbon inputs. *Nature Geoscience*, 8(12):933–936, 2015.

Wu, L., Huh, Y., Qin, J., Gu, D., and Lee, S.: Chemical weathering in the Upper Huang He (Yellow

- River) draining the eastern Qinghai-Tibet Plateau. *Geochimica Et Cosmochimica Acta*, 69(22):5279-5294, 2005.
- 630 Wu, W., Yang, J., Xu, S., and Yin, H.: Geochemistry of the headwaters of the Yangtze River, Tongtian He and Jinsha Jiang: Silicate weathering and CO<sub>2</sub> consumption. *Applied Geochemistry*, 23(12):3712-3727, 2008.
- Wu, W., Xu, S., Yang, J., and Yin, H.: Silicate weathering and CO<sub>2</sub> consumption deduced from the seven Chinese rivers originating in the Qinghai-Tibet plateau. *Chemical Geology*, 249(3), 307–320, 635 2008.
- Wu, X., Wang, N., Li, Q., Chen, L., and Jiang, X.: Ionic Compositions of Surface Snow in the Yehelong Glacier of Anyemaqen Mountains in the Headwaters of Yellow River, *Journal of Glaciology and Geocryology*, 30 (3): 415–420, 2008.
- Yang, K.: Research on Characteristics of Precipitation and Runoff in the Upper Yellow River. *Gansu Electric Power*, (6): 1–14, 1991.
- 640 Zappa, C. J., McGillis, W. R., Raymond, P. A., Edson, J. B., Hintsa, E. J., Zemmelen, H. J., Dacey, J. W. R., and Ho, D. T.: Environmental turbulent mixing controls on air-water gas exchange in marine and aquatic systems. *Geophysical Research Letters*, 34(10), 373–373, 2007.
- Zeng, Y., Feng, Z., Cao, G., and Xue, L.: The Soil Organic Carbon Storage and Its Spatial Distribution of Alpine Grassland in the Source Region of the Yellow River. *Acta Geographica Sinica*, 59(4):497-504, 645 2004.
- Zhang, L. J., Wang, L., Cai, W. J., Liu, D. M., and Yu, Z. G.: Impact of human activities on organic carbon transport in the yellow river. *Biogeosciences*, 10 (4), 2513–2524, 2013.
- Zhang, L., Xu, X., and Wen, Z.: Control factors of pCO<sub>2</sub> and CO<sub>2</sub> degassing fluxes from the Yellow River in autumn. *Advances in Water Science*, (2): 227–235, 2009.
- 650 Zhang, Y., and Wu, Y.: Analysis of Groundwater Replenishment in the Middle Reaches of Heihe River, *Journal of Desert Research*, 29 (2): 370–375, 2009.
- Zhang, Y., Zhang, S., Zhai X., and Xia, J.: Runoff Variation in the Three Rivers Source Region and Its Response to Climate Change. *Acta Geographica Sinica*, (1): 71–82, 2012.
- 655 Zhang, Y.: The carbon flux and maintaining mechanism of pCO<sub>2</sub>. Ocean University of China, 2008.

Table 1. Land cover types, altitude, stream types, pH, alkalinity, DOC,  $p\text{CO}_2$ , and  $\text{FCO}_2$  of the 36 stream sites within the Yellow River source region, expressed in the order of April, June, August, and October in 2016.

| Name | Land cover types | Apr             |                 |                 |                 |                 |                                    | Jun             |                 |                 |                 |                 |                                    | Aug             |                 |                 |                 |                 |                                    | Oct             |                 |                 |                 |                 |                                    |
|------|------------------|-----------------|-----------------|-----------------|-----------------|-----------------|------------------------------------|-----------------|-----------------|-----------------|-----------------|-----------------|------------------------------------|-----------------|-----------------|-----------------|-----------------|-----------------|------------------------------------|-----------------|-----------------|-----------------|-----------------|-----------------|------------------------------------|
|      |                  | Alkalinity      |                 | DO              | DOC             | $p\text{CO}_2$  | $\text{FCO}_2$                     | Alkalinity      |                 | DO              | DOC             | $p\text{CO}_2$  | $\text{FCO}_2$                     | Alkalinity      |                 | DO              | DOC             | $p\text{CO}_2$  | $\text{FCO}_2$                     | Alkalinity      |                 | DO              | DOC             | $p\text{CO}_2$  | $\text{FCO}_2$                     |
|      |                  | pH              | mmol            | mg              | mg              | $\mu\text{atm}$ | g C                                | pH              | mmol            | mg              | mg              | $\mu\text{atm}$ | g C                                | pH              | mmol            | mg              | mg              | $\mu\text{atm}$ | g C                                | pH              | mmol            | mg              | mg              | $\mu\text{atm}$ | g C                                |
|      |                  | L <sup>-1</sup> | L <sup>-1</sup> | L <sup>-1</sup> | L <sup>-1</sup> | $\mu\text{atm}$ | m <sup>2</sup><br>yr <sup>-1</sup> | L <sup>-1</sup> | L <sup>-1</sup> | L <sup>-1</sup> | L <sup>-1</sup> | $\mu\text{atm}$ | m <sup>2</sup><br>yr <sup>-1</sup> | L <sup>-1</sup> | L <sup>-1</sup> | L <sup>-1</sup> | L <sup>-1</sup> | $\mu\text{atm}$ | m <sup>2</sup><br>yr <sup>-1</sup> | L <sup>-1</sup> | L <sup>-1</sup> | L <sup>-1</sup> | L <sup>-1</sup> | $\mu\text{atm}$ | m <sup>2</sup><br>yr <sup>-1</sup> |
| M1   | grassland        | 8.4             | 4.4             | 7.4             | 4.6             | 662             | 435                                | 8.6             | 2.5             | 6.4             | 2.5             | 513             | 224                                | 7.5             | -               | 6.6             | 4.7             | 758             | 794                                | 8.6             | 2.9             | 8.1             | -               | 643             | 316                                |
| M2   | glacier          | 8.4             | 3.5             | 8.6             | 5.4             | 550             | 184                                | 8.6             | 1.9             | 7.2             | 3.6             | 483             | 809                                | 7.1             | -               | 6.6             | 3.5             | 514             | 212                                | 7.3             | 2.3             | 8.2             | 5.4             | 678             | 199                                |
| M3   | grassland        | 8.5             | 4               | 7.5             | 3.9             | 525             | 451                                | 8.7             | 3.1             | 6.8             | 9.5             | 572             | 28                                 | 7               | -               | 6.4             | 3.8             | 715             | 497                                | 7.8             | 3.1             | -               | 1.3             | 535             | 374                                |
| GR1  | grassland        | 7.9             | 1.7             | 8.6             | 3.7             | 886             | 307                                | 8.2             | 2.1             | 6.6             | 1.2             | 538             | 184                                | 7.6             | 2.4             | 7.1             | 3.6             | 1056            | 1603                               | 7.3             | 1.8             | 7.4             | 1.4             | 830             | 589                                |
| GR2  | grassland        | 8.5             | 4.8             | 6.8             | 5.9             | 571             | 583                                | 8.6             | -               | 7.3             | 5.3             | 488             | 49                                 | 7.8             | -               | 6.5             | -               | 1095            | 1607                               | 7.3             | 3.7             | 7.6             | 3.1             | 822             | 724                                |
| GR3  | grassland        | 8.2             | 2.8             | 7.1             | 10.0            | 686             | 297                                | 8.2             | 2.1             | 8.6             | 5.1             | 1490            | 98                                 | 7.1             | 2.8             | 5.9             | 8.2             | 611             | 120                                | 8               | 1.6             | 5.9             | 4.7             | 719             | 202                                |
| GR4  | grassland        | 8.6             | 4.2             | 6.7             | 3.6             | 614             | 175                                | 8.7             | 3               | 6.7             | 5.4             | 479             | 71                                 | 7               | 2.7             | 6.0             | 6.9             | 552             | 524                                | 7.3             | 3.9             | 8.0             | 6.6             | 510             | 1361                               |
| GR5  | grassland        | 8.4             | 4.4             | 7.5             | -               | 969             | 1426                               | 8.5             | 2.9             | 6.8             | 3.8             | 545             | 282                                | 7.1             | 2.9             | 5.8             | 2.7             | 1197            | 1956                               | 7.7             | 3.9             | 8.1             | 1.7             | -               | -                                  |
| GR6  | grassland        | 8.4             | 5.6             | 8.4             | 4.7             | 762             | 500                                | 8.5             | 3.7             | 7.6             | 9.6             | 628             | 727                                | 7.2             | 3.9             | 6.3             | 8.4             | 1863            | 1619                               | 7.3             | 5.1             | 8.4             | 4.2             | 1084            | 2174                               |
| GR7  | grassland        | 8.2             | 6.3             | 7.0             | 2.5             | 1393            | 889                                | 8.2             | 3.2             | 6.5             | 3.0             | 608             | 438                                | 7               | 3.5             | 6.9             | 2.8             | 2196            | 1478                               | 7.2             | 5.5             | 8.2             | 1.7             | 1216            | 2321                               |
| GR8  | grassland        | 8.2             | 2.6             | 8.3             | 7.4             | 720             | 199                                | 8.8             | 1.9             | 9.0             | 7.8             | 478             | 331                                | 7.2             | 2.8             | 7.3             | 2.6             | 1416            | 923                                | 7.2             | 2.8             | 7.4             | 5.3             | 593             | 457                                |
| GR9  | grassland        | 8.1             | 2.3             | 8.7             | 4.8             | 921             | 138                                | 8.5             | 1.6             | 7.0             | 6.8             | 493             | 641                                | 7.1             | 1.7             | 6.4             | 2.0             | 585             | 524                                | 7.2             | 1.9             | 7.6             | 6.7             | 515             | 533                                |
| GR10 | grassland        | 8               | 3.4             | 8.0             | 3.5             | 1124            | 1036                               | 8.6             | 2.2             | 6.7             | 2.3             | 469             | 454                                | 7.1             | 1.9             | 6.2             | 2.7             | 676             | 175                                | 7.3             | 2.4             | 7.9             | 2.4             | 496             | 236                                |
| GR11 | grassland        | 8.5             | 4.6             | 7.9             | 4.9             | 547             | 230                                | 8.7             | 3               | 6.9             | -               | 482             | 178                                | 7.2             | -               | 6.2             | 6.6             | 700             | 402                                | 7.8             | 4.1             | 7.7             | -               | 557             | 441                                |
| Pt1  | peatland         | 8.6             | 4.8             | 7.3             | 6.3             | 562             | 448                                | 8.6             | 3.4             | 6.0             | 4.5             | 522             | 107                                | 7               | 3.6             | 6.5             | 2.5             | 1970            | 1358                               | -               | 3.5             | 7.1             | 5               | 876             | 1193                               |
| Pt2  | peatland         | 8.2             | 5               | 8.5             | 6.3             | 1362            | 1128                               | 8.2             | 3.3             | 8.3             | 3.0             | 598             | 61                                 | 7.1             | 1.8             | 6.5             | 6.1             | 1461            | 328                                | 7.3             | 2.6             | 7.6             | 3.8             | 862             | 1251                               |
| Pt3  | peatland         | 7.4             | 1               | 7.6             | -               | 1809            | 831                                | 7.9             | -               | 6.6             | 1.4             | 1139            | 527                                | 7.4             | 1.1             | 6.4             | 2.4             | 862             | 6892                               | 8               | 1.2             | 7.4             | 6.8             | 1370            | 1818                               |
| Pt4  | peatland         | 8.4             | 5.9             | 8.4             | 5.3             | 511             | 383                                | 8.6             | 3.5             | 8.2             | 2.6             | 509             | 251                                | 7.3             | 3.5             | 7.5             | 3.8             | 882             | 129                                | 7.3             | 4.2             | 8.8             | 0.2             | 517             | 175                                |
| Pt5  | peatland         | 7.7             | 1               | 7.0             | 5.1             | 576             | 282                                | 8.6             | 1.5             | 7.1             | 7.6             | 660             | 273                                | 7.1             | 1.8             | 6.3             | 4.2             | 523             | 92                                 | 7.2             | 1.7             | 7.8             | 4.4             | 856             | 650                                |

|      |            |     |     |     |     |      |      |      |     |      |      |      |     |     |     |     |      |      |      |     |     |     |      |      |      |
|------|------------|-----|-----|-----|-----|------|------|------|-----|------|------|------|-----|-----|-----|-----|------|------|------|-----|-----|-----|------|------|------|
| Pt6  | peatland   | 7.5 | 0.6 | 8.0 | 4.3 | 1177 | 1015 | 7.9  | 1.2 | 6.3  | 9.4  | 652  | 221 | 7.1 | 0.8 | 5.9 | 3.1  | 632  | 546  | 7.6 | 0.9 | 7.0 | 4.6  | 1206 | 1515 |
| Pt7  | peatland   | 7.6 | 0.7 | 8.2 | -   | 612  | 1469 | 8.2  | 1.5 | 7.0  | -    | 490  | 267 | 7.2 | 1.3 | 5.5 | 3.5  | 755  | 1778 | 7.5 | 1   | 8.0 | 3.2  | 685  | 123  |
| Pt8  | peatland   | 7.6 | 1.1 | 7.8 | 6.3 | 712  | 454  | 8.2  | 1.3 | 6.4  | -    | 567  | 172 | 7.2 | 1.2 | 6.2 | 2.1  | 2441 | 1226 | 7.9 | 1.2 | 7.6 | 3.9  | 732  | 2030 |
| Pt9  | peatland   | 8.6 | 4.8 | 8.1 | 6.6 | 562  | 34   | 8.1  | -   | -    | 12.2 | 891  | 307 | 7.1 | 2.1 | 7.5 | 21.7 | 1268 | 61   | 7.3 | -   | 7.1 | 5.1  | 1338 | 346  |
| Pt10 | peatland   | 7.8 | 1   | 7.1 | 5.1 | 865  | 126  | 8.5  | 1.6 | -    | 3.0  | 1891 | 89  | 7.1 | -   | 7.5 | 3.4  | 761  | 233  | -   | 1.1 | 7.2 | -    | 815  | 478  |
| GL1  | glacier    | 8.4 | 3.9 | 7.2 | 4.4 | 656  | 1190 | -    | -   | -    | -    | -    | -   | 7.6 | 1.2 | 8.3 | 2.1  | 273  | -144 | 7.2 | 2.9 | 9.8 | 4.8  | 806  | 454  |
| GL2  | glacier    | 8.2 | 1.8 | 8.7 | 4.7 | 859  | 1318 | 8.6  | -   | 7.5  | 2.0  | 484  | 83  | 7.5 | -   | 6.6 | -    | 628  | 392  | 7.5 | -   | 7.7 | -    | 711  | 399  |
| GL3  | glacier    | 8.5 | 3.1 | 8.2 | 4.7 | 606  | 156  | 8.7  | 2.3 | 6.8  | 2.8  | 492  | 52  | 7.3 | 1.9 | 6.4 | 4.5  | 692  | 583  | 7.8 | 2.5 | 8.0 | 3.9  | 523  | 230  |
| GL4  | glacier    | 8.4 | 3.1 | 8.1 | 2.7 | 514  | 205  | -    | -   | -    | -    | -    | -   | 7.5 | 2.1 | 6.6 | 4.5  | 716  | 328  | 7.8 | 3.1 | 8.4 | 4.6  | 672  | 328  |
| GL5  | glacier    | 8.5 | 3.1 | 7.5 | 4.1 | 630  | 46   | -    | -   | -    | -    | -    | -   | 7.3 | 2.2 | 6.9 | 2.9  | 525  | 1119 | 7.3 | -   | 7.8 | -    | 441  | 175  |
| GL6  | glacier    | 8.5 | 4   | 7.2 | 3.9 | 542  | 405  | 8.6  | -   | 6.9  | 1.2  | 542  | 264 | 7.3 | 2.8 | -   | 2.2  | 1592 | 2459 | -   | 2.3 | 7.9 | 4    | 640  | 632  |
| Pm1  | permafrost | 8.8 | 3.2 | -   | 3.4 | 236  | -141 | 10.6 | 7.4 | 12.1 | -    | -    | -   | 7.3 | 2.9 | 6.7 | 6.5  | 560  | 18   | 7.2 | -   | 8.5 | -    | 936  | 101  |
| Pm2  | permafrost | 8.6 | 4.1 | -   | 5.5 | 511  | 426  | 8.7  | -   | 6.2  | 5.1  | 483  | 138 | 7.2 | 3   | 5.7 | 8.2  | 538  | 270  | 8.1 | 7.6 | 6.4 | -    | 927  | 933  |
| Pm3  | permafrost | 8.8 | 5.2 | -   | 6.3 | 681  | 267  | 9    | -   | 7.2  | 5.0  | 447  | 44  | 7.2 | -   | 6.9 | 7.1  | 554  | 149  | -   | 4.1 | 7.2 | 3.8  | 365  | -34  |
| Pm4  | permafrost | 8.3 | 3.2 | 8.0 | 2.8 | 495  | 254  | 8.5  | -   | 6.7  | 1.5  | 508  | 126 | 7.2 | -   | 6.4 | 2.5  | 628  | 316  | -   | 2.2 | 8.4 | 1.1  | 583  | 227  |
| Pm5  | permafrost | 8.3 | 4.3 | 7.7 | 4.6 | 688  | 322  | 8.7  | 3.4 | 6.9  | 4.8  | 502  | 374 | 7.2 | 3.1 | 7.4 | 7.1  | 726  | 757  | 7.2 | 4.4 | 8.0 | 10.6 | 859  | 806  |
| Pm6  | permafrost | 8.3 | 2.1 | 7.3 | 7.4 | 181  | -221 | 8.5  | 2.5 | 6.2  | 4.6  | 989  | 478 | 7.3 | 1.8 | 9.2 | 6.5  | 540  | 98   | -   | 2.6 | 7.0 | 1.4  | 866  | 1233 |



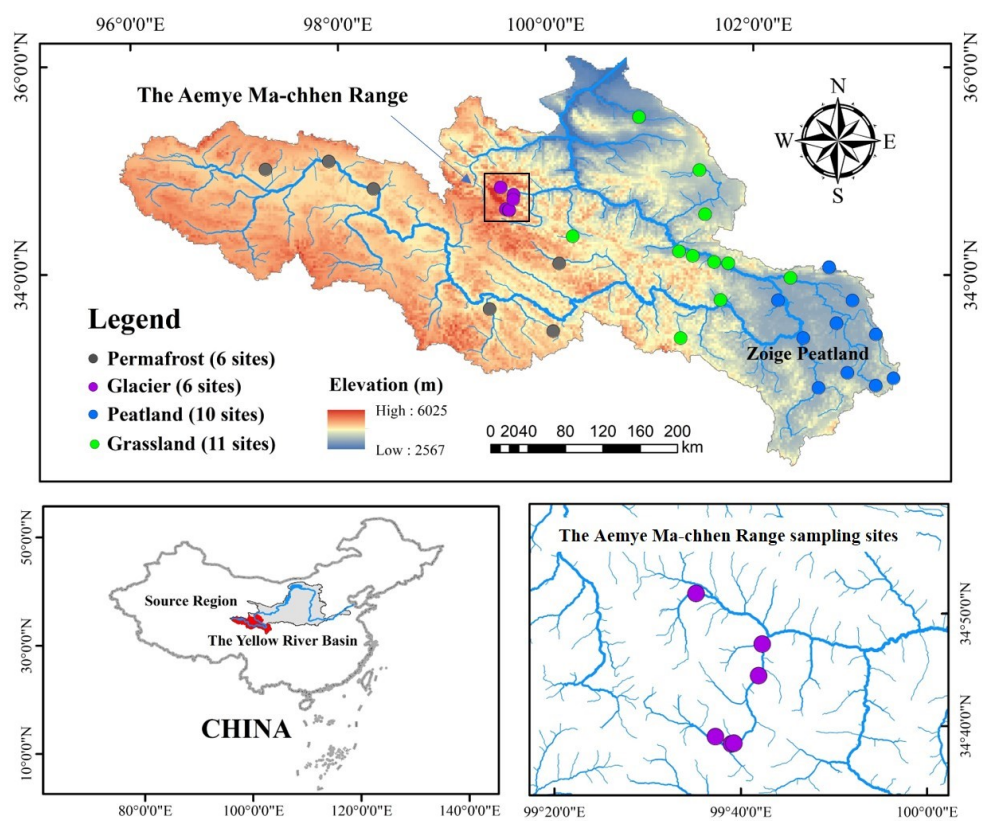

Figure 1. Sampling sites of the Yellow River source region

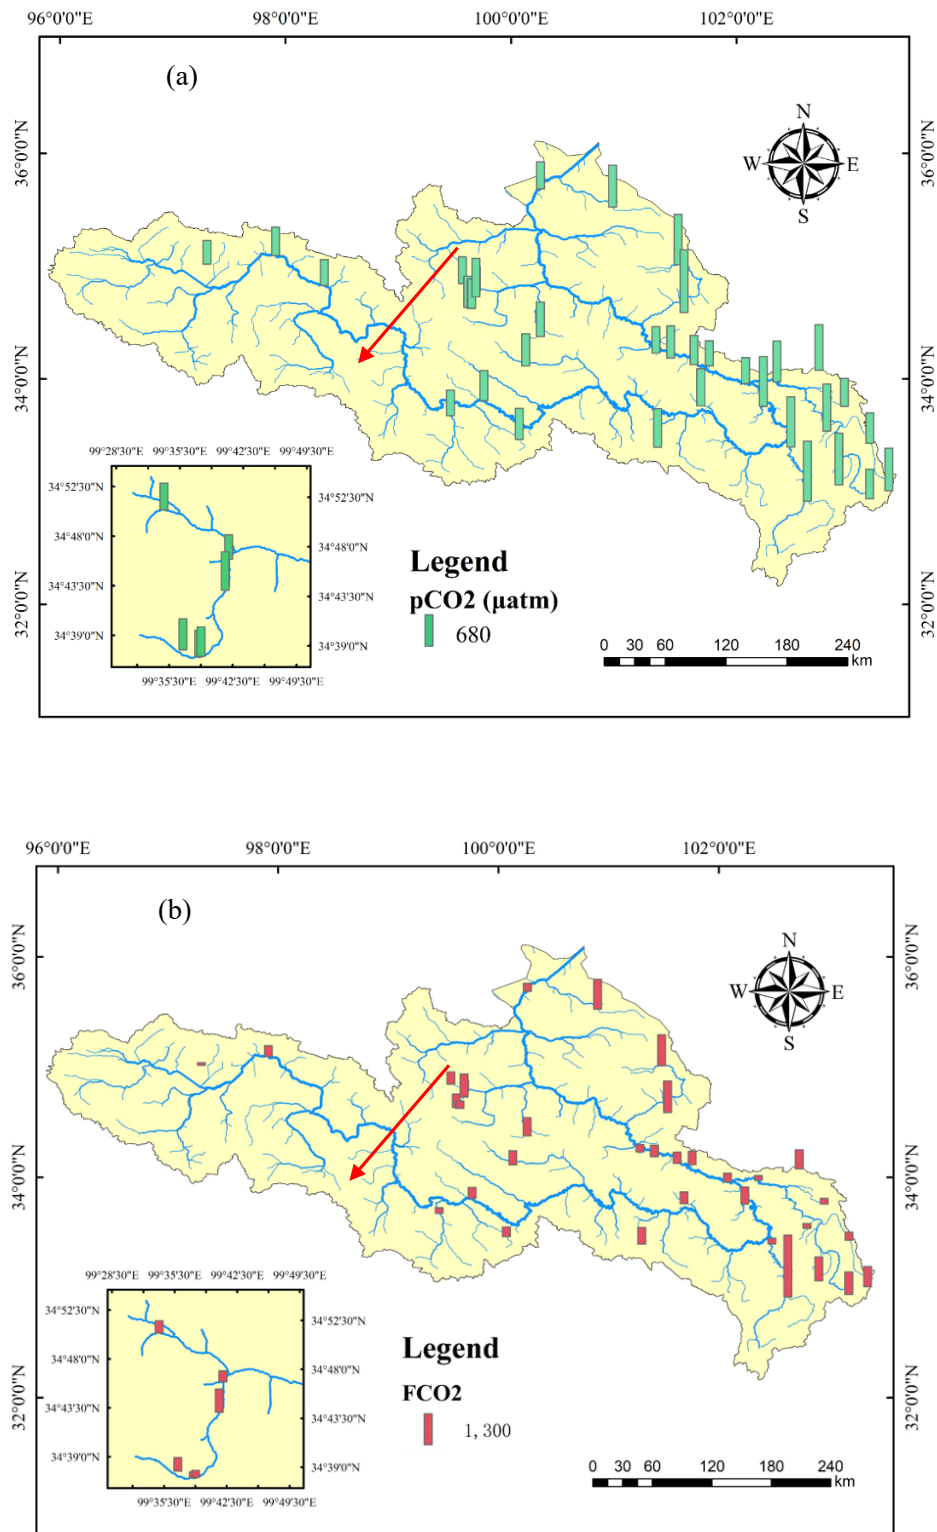

Figure 2. Spatial and temporal variations of annual average  $p\text{CO}_2$  (a) and  $\text{FCO}_2$  (b) within the Yellow River source region in 2016.

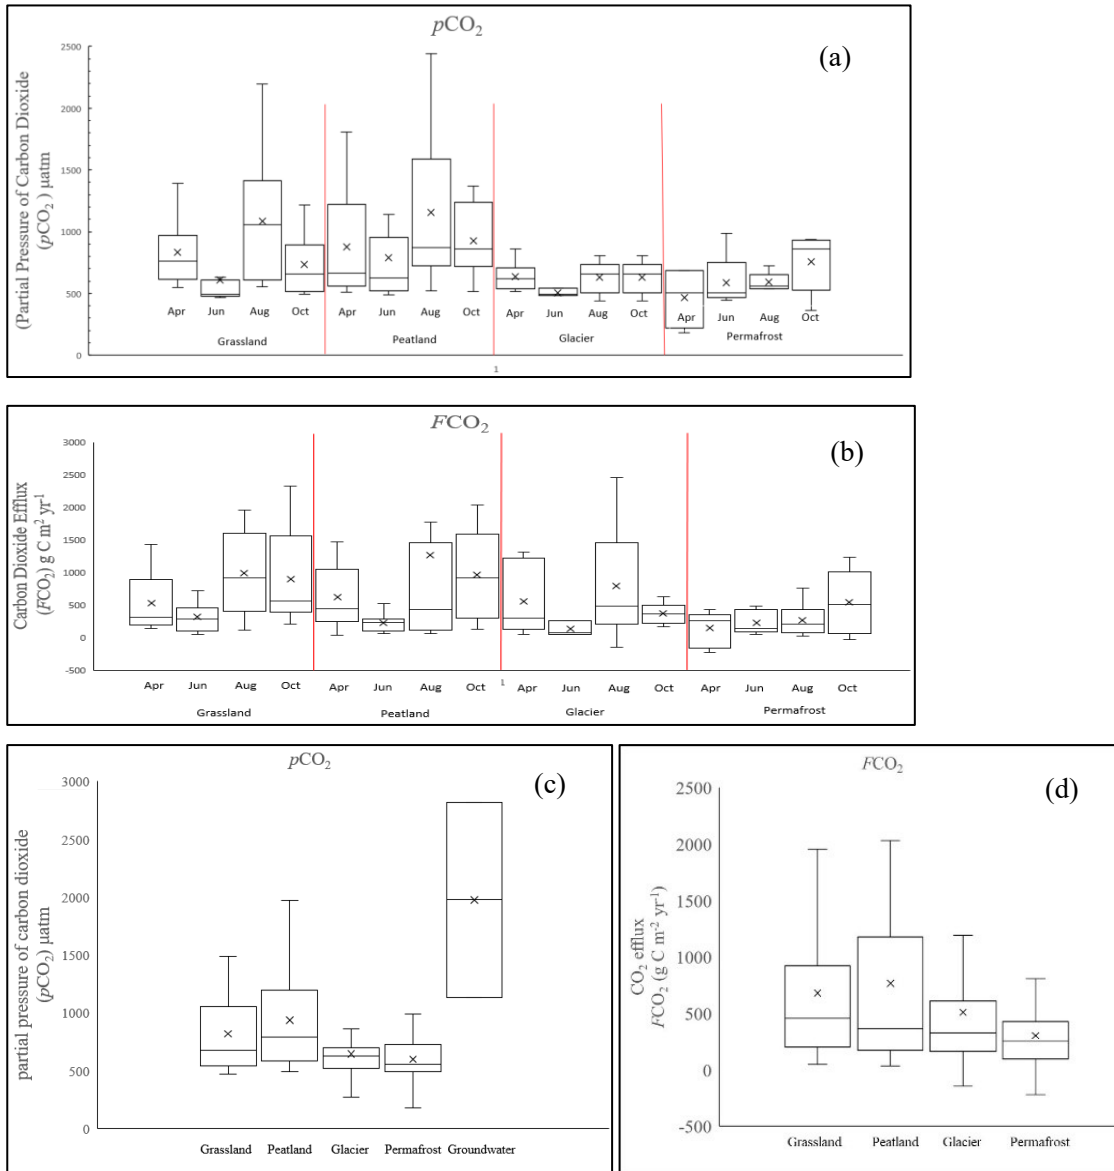

Figure 3. The box plots of  $p\text{CO}_2$  and  $F\text{CO}_2$  under four different land cover types within the Yellow River source region, expressed in the order of April, June, August, and October of 2016 (a and b). The  $p\text{CO}_2$  data expressed in the order of grassland, peatland, glacier, permafrost, and groundwater (c). The  $F\text{CO}_2$  expressed in the order of grassland, peatland, glacier, and groundwater (d).

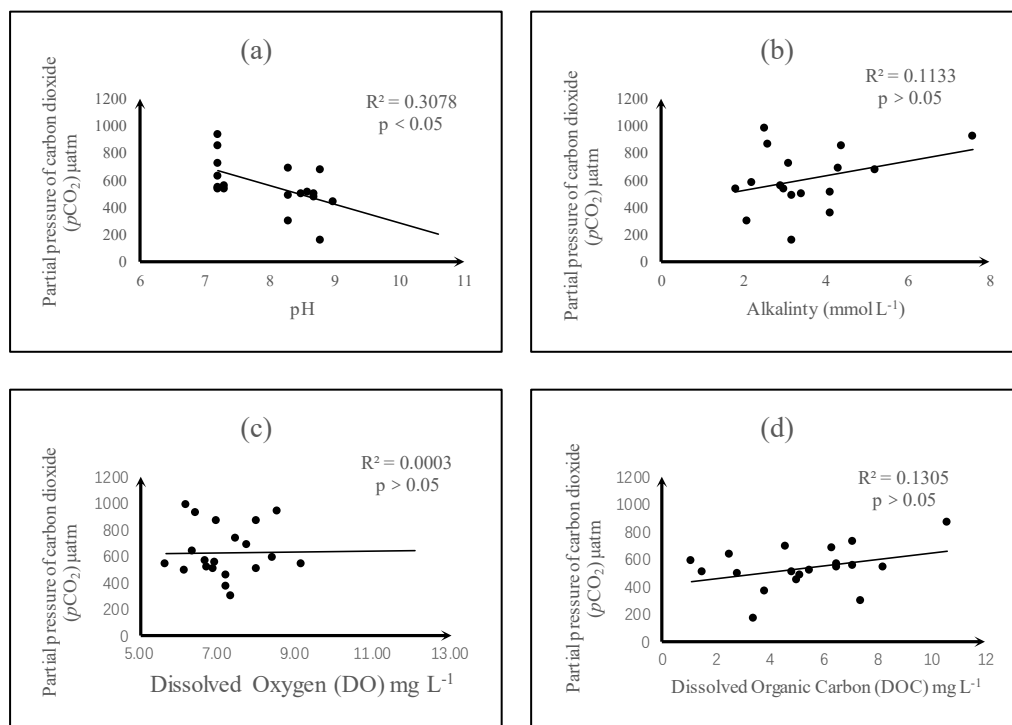

Figure 4. The linear relationship of hydro-chemical parameters and  $p\text{CO}_2$  in permafrost covered region. (a) pH, (b) alkalinity, (c) dissolved oxygen, and (d) dissolved organic carbon.

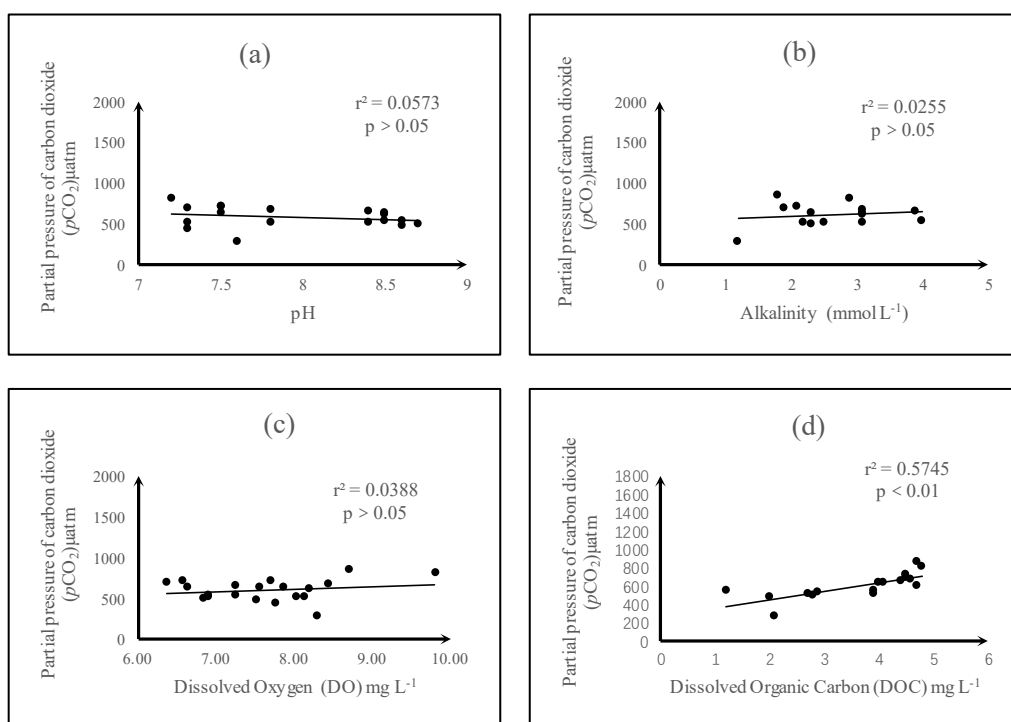

Figure 5. The linear relationship of hydro-chemical parameters and  $p\text{CO}_2$  in glacier covered region. (a) pH, (b) alkalinity, (c) dissolved oxygen, and (d) dissolved organic carbon.

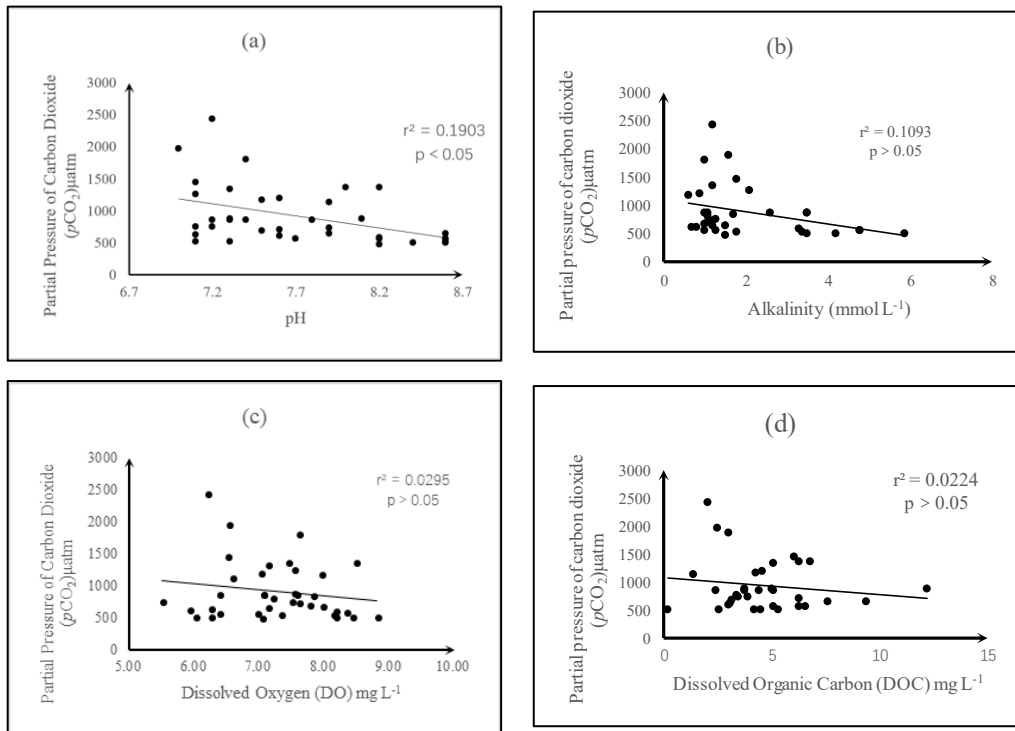

**Figure 6.** The linear relationship of hydro-chemical parameters and  $p\text{CO}_2$  in peatland covered region. (a) pH, (b) alkalinity, (c) dissolved oxygen, and (d) dissolved organic carbon.

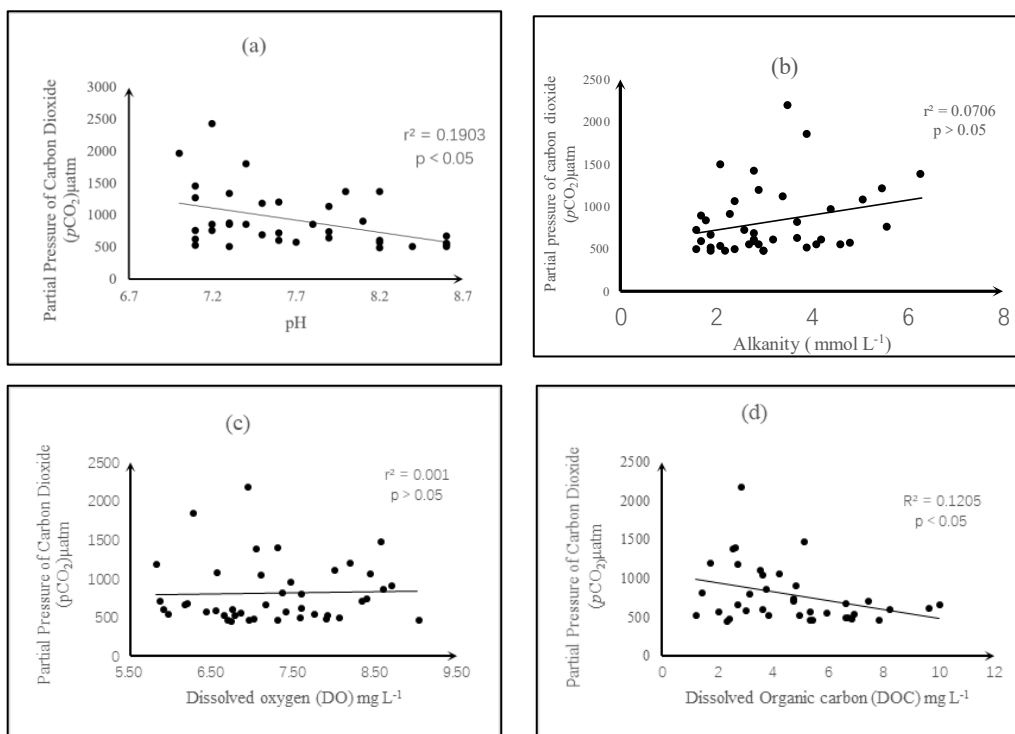

**Figure 7.** The linear relationship of hydro-chemical parameters and  $p\text{CO}_2$  in grassland covered region. (a) pH, (b) alkalinity, (c) dissolved oxygen, and (d) dissolved organic carbon.

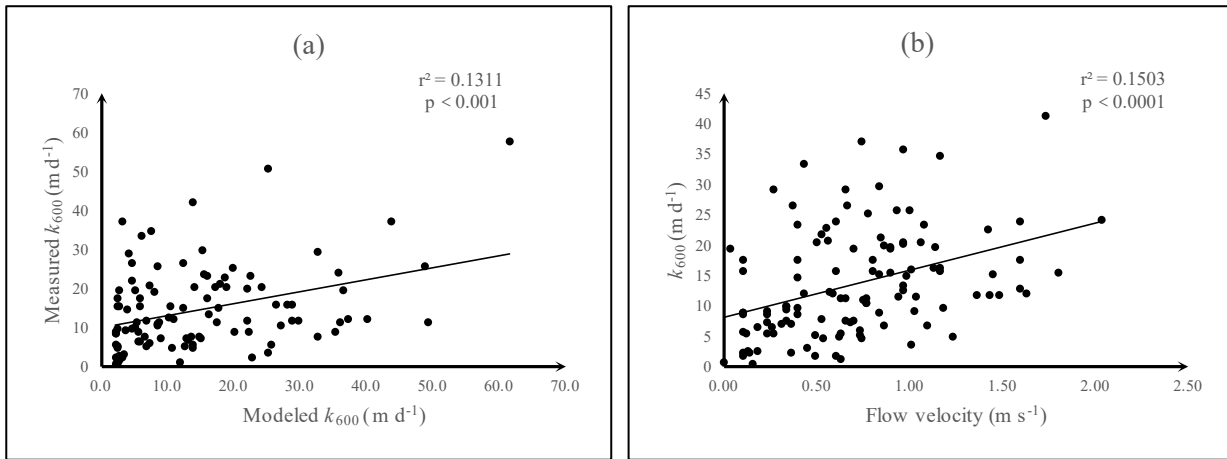

Figure 8. (a) The relationship between actual measurements [based on *in situ*  $p\text{CO}_2$  and  $F\text{CO}_2$ ] and predicted  $k_{600}$  using the Model5 of Raymond et al. (2012) for streams; (b) Correlation between standardized [based on *in situ*  $p\text{CO}_2$  and  $F\text{CO}_2$ ] gas transfer velocity ( $k_{600}$ ) and flow velocity over the 4 campaigns of field sampling.
